# Supplementary material for: Cellular and Genomic Features of Muscle Differentiation from Isogenic Fibroblasts and Myoblasts
Source: MDPI journal article supplement (doi:10.3390/cells12151995), 2023-08-03
Supplement: s1 [file s1]

## Supplementary data

**Table S3.** Genes located in McF-only LADs, cLADs and MT-only LADs.

| McF-only LADs | cLADs     | MT-only LADs |
|---------------|-----------|--------------|
| SAMD11        | TTC34     | NPHP4        |
| ABCB11        | ZNF214    | TMBIM4       |
| AC007846.2    | OTUD1     | AP000781.2   |
| AC010327.2    | OR51G2    | SLC2A14      |
| AC020922.1    | HBD       | CLEC4E       |
| AC087498.1    | C10orf113 | TNKS1BP1     |
| AC092073.1    | C10orf82  | TMPRSS13     |
| AC098588.2    | OR10G6    | FAM71D       |
| AC243967.1    | EBF3      | KCNJ1        |
| ACAP3         | LRRC38    | C8A          |
| ACO1          | GPC5      | AC005697.1   |
| ACP3          | OR4D10    | EDNRB        |
| ACP6          | JAK1      | RBMXL1       |
| ACTR3B        | GNPTAB    | ZFHX3        |
| ACTR3C        | ANO4      | AC010547.4   |
| ADAM28        | PAH       | C16orf46     |
| ADAM29        | OR8B4     | DICER1       |
| ADAM32        | LHX5      | HSD17B2      |
| ADAMTS20      | OR6K3     | COA6         |
| ADAMTS3       | CARD16    | SLC25A21     |
| ADAMTS9       | OR8K1     | SLC46A3      |
| ADAMTSL3      | OR2T1     | USH1C        |
| ADGRB3        | NCKAP1L   | PIGB         |
| ADGRE1        | ALDH18A1  | CEP126       |
| ADGRF1        | TWF1      | DUT          |
| ADGRF5        | IRAK4     | AC090527.3   |
| ADGRL2        | KANK4     | CTH          |
| ADGRL3        | PGR       | MBIP         |
| ADGRL4        | L1TD1     | HHLA3        |
| ADGRV1        | GLB1L3    | BCL11B       |
| AFDN          | TMEM19    | XYLT1        |
| AGBL1         | OR2T2     | OTOG         |
| AGRN          | TP73      | IGSF21       |
| AKAIN1        | MTRNR2L7  | MPEG1        |
| AKR1D1        | UHRF1BP1L | SLC6A2       |
| AL035425.3    | IFI27L1   | FADS6        |
| AL357075.4    | HELB      | VPS33B       |
| AL358113.1    | FGF14     | ASIC2        |
| AL592490.1    | PCNX2     | FRMPD2       |
| AL928654.3    | OR2AK2    | UTF1         |

## Supplementary data

|           |          |            |
|-----------|----------|------------|
| ALG14     | PGM1     | AC093155.3 |
| ALG1L2    | GLYAT    | PCDH8      |
| AMTN      | CASP5    | NKX2-8     |
| ANKEF1    | CYP2R1   | C12orf29   |
| ANKFN1    | MASTL    | FAM111B    |
| ANKRD30B  | CTNNA3   | CCDC90B    |
| ANKRD65   | CYP4A22  | LEPROT     |
| ANKRD66   | ADAMTS20 | SLC30A4    |
| ANO3      | LCE2C    | SCYL3      |
| ANP32D    | OR6N2    | CHRM3      |
| AOC1      | SYCP3    | PMFBP1     |
| APCS      | LRRIQ3   | AC093423.3 |
| ARAP2     | MS4A6E   | FGF14      |
| ARHGAP28  | BMS1     | PATL1      |
| ARL6IP6   | OR2AG1   | ETNK1      |
| ARMC4     | SETSIP   | AL590560.2 |
| ARMH4     | GCSAML   | HABP2      |
| ARPP21    | OR5T1    | PAN3       |
| ASB7      | ITIH5    | MRGPRX1    |
| ASCL4     | TNN      | ARHGAP21   |
| ASPHD2    | OR5AS1   | GTF3A      |
| ASTN2     | CMA1     | TAF15      |
| ATG4A     | CCDC197  | TMEM104    |
| ATP6V0D2  | FZD10    | SCO1       |
| ATP6V0E2  | GAS2L3   | ZNF23      |
| ATP8A1    | FAM181B  | BIVM       |
| ATP8A2    | PROX1    | NCOA4      |
| ATRNL1    | AMY2A    | TMCO1      |
| AURKAIP1  | CYP4A11  | CACHD1     |
| AVEN      | OR2M4    | RIC3       |
| AXDND1    | MSH4     | NTNG1      |
| B3GALT1   | OR10A2   | TMEM117    |
| B3GALT6   | AJAP1    | GJB4       |
| BCL9      | RAVER2   | KYAT3      |
| BEND2     | CCDC198  | SUPT4H1    |
| BEND4     | MS4A12   | POGLUT2    |
| BFSP2     | OR4D9    | GPC6       |
| BNC1      | OR2T4    | KCNJ11     |
| BRMS1L    | RGS7     | LRIT2      |
| BRSK1     | OR52A5   | ZNF705A    |
| BTC       | CARD17   | MIPOL1     |
| BTLA      | OR9G4    | CNMD       |
| C12orf42  | SELE     | KIAA1217   |
| C12orf54  | MNDA     | FMN2       |
| C14orf177 | TRIM58   | INPP5A     |
| C14orf28  | OPN3     | GRID1      |
| C14orf39  | OR2G3    | SLC18A2    |

## Supplementary data

|          |            |           |
|----------|------------|-----------|
| C19orf85 | OR51B6     | CLEC2D    |
| C1orf159 | SMIM1      | CSMD2     |
| C1QTNF12 | PRAMEF19   | GJB3      |
| C2orf83  | CYB5R2     | MYF6      |
| C4BPA    | GBP4       | CHIA      |
| C4orf19  | MS4A5      | CCDC168   |
| C7orf31  | SYT1       | ERI2      |
| CADM2    | OR5M11     | TRPC4     |
| CARMIL1  | ALG10B     | SORD      |
| CASP14   | OPALIN     | GUCY1A2   |
| CAVIN4   | OR4E2      | PEX12     |
| CCDC106  | TRIM5      | OLR1      |
| CCDC140  | SYT9       | PPP1R12A  |
| CCDC175  | OR2C3      | NRAP      |
| CCDC60   | LAMB3      | ZFAND4    |
| CCNA1    | SMYD2      | MSMB      |
| CCNG1    | AC022335.1 | ARHGAP11B |
| CCNL2    | CYP4X1     | JAK1      |
| CCSER1   | CARD18     | TTC6      |
| CD200    | OR9G1      | NHLRC3    |
| CD84     | LRRC53     | CDC7      |
| CDC14C   | PPFIA2     | DCUN1D3   |
| CDC42EP5 | OR51E1     | KCNA1     |
| CDH12    | PANX3      | TCL1B     |
| CDH19    | CYP2C19    | IZUMO1R   |
| CDH4     | OR4C13     | ADGRD1    |
| CDH6     | TMEM45B    | TUNAR     |
| CDH7     | AL583836.1 | PANX1     |
| CDH8     | C1QL3      | ELP4      |
| CDK5RAP2 | GZMH       | GAS2L2    |
| CEACAM21 | CLRN3      | PANX3     |
| CEACAM3  | GLRX3      | C11orf45  |
| CEACAM4  | PTPRE      | TBRG1     |
| CEACAM5  | MGMT       | FLI1      |
| CEACAM6  | C10orf143  | KCNJ5     |
| CEACAM7  | MKI67      | SIAE      |
| CEP170   | ZNF326     | SPAG17    |
| CERS6    | OR10A4     | SLC16A7   |
| CFAP54   | SELL       | ARMC3     |
| CFAP58   | AMY2B      | ALDH9A1   |
| CFAP73   | PAPPA2     | THNSL1    |
| CHD2     | PRKCQ      | IGSF22    |
| CHRNA7   | OR2M5      | NLRP10    |
| CLCA1    | ITGB3BP    | C1orf52   |
| CLCA2    | ALG6       | SYDE2     |
| CLCA4    | EFCAB7     | BCL10     |
| CLDN18   | CBLIF      | GPR180    |

## Supplementary data

|         |         |            |
|---------|---------|------------|
| CLSTN2  | OOSP3   | ABCC4      |
| CLVS1   | WSB2    | CFAP52     |
| CNR1    | LACRT   | HCN4       |
| CNTN5   | CD1A    | KCTD3      |
| CNTNAP2 | SLC17A8 | CALB2      |
| CNTNAP3 | HS6ST3  | LYRM9      |
| CNTNAP5 | DCHS1   | CMAS       |
| COBL    | MGAT4C  | C16orf78   |
| COL24A1 | ATG4C   | ST6GALNAC5 |
| COL4A5  | DDX24   | FDXR       |
| COL4A6  | OTUB2   | GRIN2C     |
| COL6A5  | OR5AN1  | DIAPH3     |
| COL6A6  | OR5A2   | TDRD3      |
| COX6B2  | HBB     | CLEC4D     |
| COX7B2  | JRKL    | TNFSF13B   |
| COX8C   | OR11L1  | DOCK1      |
| CPNE4   | OR4D6   | SLAIN1     |
| CPTP    | C1orf94 | OMA1       |
| CRIM1   | CCKBR   | MGST1      |
| CRIP1   | OR2L8   | KNDC1      |
| CRIP2   | OR2AJ1  | ADGRA1     |
| CRP     | FPGT    | LRRC8D     |
| CRYBB2  | TRIM51  | PABPC3     |
| CRYBB3  | OR5D16  | CENPJ      |
| CSMD1   | PMCH    | AC092718.8 |
| CSMD3   | MTUS2   | CDRT15     |
| CXXC4   | TMEM225 | AP5M1      |
| CYB5A   | PDLIM1  | TRPC6      |
| CYLD    | PTER    | IMMP1L     |
| CYP2B6  | FOXI2   | OR6M1      |
| CYP4F11 | SORCS1  | NPAT       |
| CYP4F3  | SORCS3  | ACAT1      |
| CYP4F8  | HPSE2   | ALKBH8     |
| DACH1   | KCNK1   | WDFY4      |
| DAOA    | SLC35F3 | LRRC18     |
| DCAF4L2 | ATP8A2  | COX10      |
| DCAF8L1 | GALC    | ABCA9      |
| DCAF8L2 | RGS6    | FAM20A     |
| DCC     | CYP2C18 | HEPHL1     |
| DCHS2   | OR10G7  | DIO2       |
| DDC     | RASSF9  | PLK1       |
| DDX54   | ASTN1   | ZNF248     |
| DEFB115 | PLEKHA7 | RPH3A      |
| DEFB116 | PRMT3   | OAS1       |
| DEFB118 | SLC6A5  | OAS3       |
| DEFB119 | NELL1   | TBX3       |
| DEFB121 | ANO5    | FBXW8      |

## Supplementary data

|             |          |           |
|-------------|----------|-----------|
| DEFB123     | SLC17A6  | TESC      |
| DEPDC1B     | NCAPD3   | ATG2B     |
| DLG2        | FCRL3    | C1orf53   |
| DLGAP1      | ANKRD30A | DTX4      |
| DMRTA1      | SLITRK6  | LGALS9    |
| DMRTC2      | OR52B4   | ARHGAP32  |
| DNER        | OR10A6   | SLC6A15   |
| DNAAF3      | OR51G1   | SLC2A3    |
| DOCK3       | OR8K3    | POMP      |
| DPP6        | DRAM1    | CDYL2     |
| DTHD1       | MS4A7    | TPP2      |
| DTNA        | NRG3     | SLC36A4   |
| DTX1        | KIAA0040 | PRTFDC1   |
| DUSP27      | RABGGTB  | PRMT6     |
| DVL1        | GRIK3    | NFIA      |
| DZIP1L      | TCN1     | SOX21     |
| EDEM1       | OR5J2    | CDX2      |
| EFCAB3      | ACBD5    | FAM111A   |
| ELAVL2      | SLITRK5  | NOS2      |
| ENPP6       | OR8B12   | SYNE3     |
| ENTHD1      | OR8I2    | MTIF3     |
| EPB41L3     | ZNF33B   | OSBP      |
| EPHA5       | CASP4    | NKX2-1    |
| EPHA6       | OR5M1    | FREM2     |
| EPHB1       | STX3     | DCT       |
| EPN1        | OR56B1   | GABARAPL1 |
| EPPIN       | FSHB     | TMEM132B  |
| EPPIN-WFDC6 | KCNA4    | SUDS3     |
| EPS8L1      | OR51F2   | DPPA3     |
| ERGIC2      | OR6Y1    | RAB3GAP2  |
| EYA4        | OR9K2    | EFL1      |
| EYS         | DBX2     | PIGBOS1   |
| FABP4       | GLT1D1   | MYH13     |
| FABP9       | TMEM132C | GAS7      |
| FAF1        | NFIA     | LRRC40    |
| FAM163A     | MCOLN2   | KCNA2     |
| FAM189A2    | FAM155A  | SLC35G3   |
| FAM214A     | OR2T12   | FAR1      |
| FAM71E2     | HBG1     | AICDA     |
| FAM81B      | B3GAT1   | BEGAIN    |
| FANCM       | MAP1LC3C | TECTB     |
| FAR2        | OR10R2   | IARS2     |
| FBXO15      | CYP2C8   | MRE11     |
| FERMT1      | PSMA1    | LRRIQ1    |
| FGGY        | TM2D1    | SRSF11    |
| FIGNL1      | ALX1     | DCTN5     |
| FIZ1        | UBQLNL   | CLEC12A   |

## Supplementary data

|               |                 |            |
|---------------|-----------------|------------|
| FKBP1C        | TMEM117         | RSL24D1    |
| FKBP3         | BECN2           | GPAM       |
| FLRT2         | OR1C1           | GPR26      |
| FMN1          | OR2M2           | EIF3F      |
| FOLH1         | IVL             | COP1       |
| FOXA2         | C11orf58        | CMKLR1     |
| FREM3         | OR10S1          | GPHN       |
| FRG2          | OR8A1           | GLRX5      |
| FRG2C         | AP002512.3      | ALG5       |
| FRK           | TESPA1          | STARD5     |
| FRMD4B        | OR8U1           | RFXAP      |
| FSCB          | KMO             | LRIT1      |
| FSTL5         | OR10D3          | TSHR       |
| FXN           | NALCN           | SPACA3     |
| FAAP20        | TAL1            | PDE4B      |
| G6PC2         | ZNF215          | AC078927.1 |
| GABRA1        | SLCO1B3         | GOLGA8S    |
| GABRA2        | DEUP1           | ABHD13     |
| GABRA4        | CNTN5           | OR4N2      |
| GABRA6        | SLCO1C1         | CYFIP1     |
| GABRB1        | ARHGAP42        | FOXG1      |
| GABRB2        | PDE3A           | NIPA2      |
| GABRG1        | FAT3            | LIG4       |
| GABRG2        | SLCO1B3-SLCO1B7 | GOLGA6L7   |
| GALNTL6       | OR8B2           | PTPN21     |
| GAPT          | SPATA19         | BDKRB2     |
| GC            | CASP1           | PAX9       |
| GCNT1         | MYO16           | SLFN11     |
| GDAP1         | SRRM4           | DHRS7C     |
| GIMAP1        | UTP20           | DHODH      |
| GIMAP1-GIMAP5 | ARL1            | TXNL4B     |
| GIMAP2        | SLC5A8          | PKD1L3     |
| GIMAP5        | SPIC            | HP         |
| GJA5          | AK4             | GBP3       |
| GJA8          | DNAJC6          | GBP1       |
| GLRA3         | OR8B3           | ZC3H14     |
| GLUL          | WDR63           | DRAM2      |
| GNA14         | OR4K2           | SLFN12     |
| GNAQ          | OR4K5           | SLFN13     |
| GNPDA2        | CHORDC1         | FAM155A    |
| GP6           | OR51F1          | APOBEC1    |
| GPA33         | ACADM           | SNX7       |
| GPI           | PNLIPRP1        | FXYD6      |
| GPM6A         | OR8B8           | CLMN       |
| GRAP2         | OR8H2           | LNX2       |
| GRB10         | NTS             | C16orf82   |
| GRID1         | PLPPR5          | ITLN2      |

Supplementary data

|          |            |            |
|----------|------------|------------|
| GRID2    | GRIA4      | SSTR1      |
| GRIK2    | MUCL1      | IL16       |
| GRK3     | OR5I1      | MTMR6      |
| GRM1     | TAF12      | SAXO2      |
| GRM5     | FCRL1      | LAMB3      |
| GRM7     | OR5T2      | URAD       |
| GRM8     | FAM71C     | CAPNS2     |
| GUF1     | NAALAD2    | ARGLU1     |
| H1-7     | OR6N1      | GPR137B    |
| H2AC1    | KIF21A     | DUOX2      |
| H2BC1    | ABCD2      | DUOX1      |
| HCN1     | OPCML      | C14orf132  |
| HELLS    | COL11A1    | PBX1       |
| HERC2    | OR2L13     | OR10A3     |
| HES4     | TPRG1L     | HNRNPCL1   |
| HES5     | SPATA6     | C1orf141   |
| HMMR     | SLCO1A2    | NANOGP8    |
| HOOK1    | PATJ       | ANKRD13C   |
| HPSE2    | RNPC3      | MGST3      |
| HS3ST1   | MS4A2      | RAP2A      |
| HSPBP1   | OR52E2     | AC092111.3 |
| HTR4     | RERGL      | NIPA1      |
| HTR7     | PLPPR4     | RGS5       |
| ICA1     | TPH2       | IQCK       |
| IFTAP    | LCE2A      | METTLL11B  |
| IGF2R    | TSPAN8     | ST8SIA2    |
| IGSF1    | IFI27L2    | OTOP2      |
| IKZF1    | LRRIQ1     | COG7       |
| IL11     | AC104389.6 | MFAP5      |
| IL1RAPL1 | GPR65      | ABCA6      |
| IL1RAPL2 | KCNK10     | ABCA10     |
| ILDR2    | LHX8       | PTBP2      |
| IMMP2L   | APAF1      | MMP2       |
| IMPG1    | PPP1R1A    | NEO1       |
| INTS11   | PRDM2      | DAB1       |
| IPCEF1   | IRAK3      | AC068831.8 |
| IQCD     | CACNA1E    | BMS1       |
| IQGAP2   | THYN1      | AK7        |
| IRS4     | IFI27      | USH1G      |
| ISG15    | WRAP73     | PRAMEF2    |
| ISOC2    | OR51B2     | KLRB1      |
| JPH1     | SUDS3      | USP43      |
| JRKL     | CD1D       | KCNK2      |
| KAZN     | CYP2J2     | DEPDC1     |
| KCNC2    | SELP       | SPAG6      |
| KCNIP4   | MS4A4A     | NALCN      |
| KCNMB4   | POGK       | COMMD3     |

## Supplementary data

|          |          |             |
|----------|----------|-------------|
| KCNU1    | OAS1     | SDR42E1     |
| KCTD1    | LRRTM3   | CTSC        |
| KCTD16   | GRIN2B   | KIF26A      |
| KCTD8    | DLG2     | ERCC5       |
| KHDRBS3  | POU4F1   | KSR1        |
| KIF16B   | CALCA    | TMTC3       |
| KIF25    | RAB21    | TMC5        |
| KIRREL3  | CD1E     | ZC3H11B     |
| KIAA0355 | PNLIP    | FXVD6-FXVD2 |
| KIAA1671 | OR5L2    | RNF17       |
| KLHL1    | MAP3K21  | MAPK8       |
| KLHL17   | PRDM16   | PRAMEF12    |
| KLHL28   | CHML     | TLL2        |
| KLK4     | TRIM21   | TMEM45B     |
| KMT5C    | OR51V1   | CLEC6A      |
| KRBA1    | NR1H4    | TLE7        |
| KY       | MRPL16   | TGDS        |
| LAIR1    | OR52I2   | OPCML       |
| LAIR2    | OR51E2   | KCNA5       |
| LALBA    | AIM2     | OR2T10      |
| LAMA1    | OR13A1   | OR10V1      |
| LENG8    | TRIM68   | GALNT8      |
| LENG9    | OR51D1   | KCNA6       |
| LGALS13  | TEX36    | ZNF202      |
| LGALS16  | NPS      | OR6X1       |
| LGSN     | NELL2    | RAB27A      |
| LHFPL3   | IKBIP    | IRX6        |
| LILRA4   | OR52M1   | NTM         |
| LILRA5   | OR52K1   | PRDM10      |
| LILRB2   | OR52K2   | NFRKB       |
| LINS1    | SFMBT2   | PTPN5       |
| LMBRD1   | PDE1B    | CCPG1       |
| LPAR3    | DOCK7    | ZRANB2      |
| LRATD2   | OLFM4    | HS3ST3B1    |
| LRFN5    | FH       | RGR         |
| LRP5L    | OR5W2    | AMER2       |
| LRRC31   | OOSP4B   | DNAJC3      |
| LRRC3B   | OR5T3    | FLT3        |
| LRRC4C   | LCE4A    | GORAB       |
| LRRC9    | OR2G2    | PLEKHS1     |
| LRRIQ4   | OOSP4A   | DZIP1       |
| LRRN3    | ANKS1B   | LPCAT2      |
| LRRTM4   | TRIM3    | PYROXD1     |
| LSM14A   | PNLIPRP3 | FXVD2       |
| LYPD4    | TCERG1L  | TP53AIP1    |
| MACROD2  | CALCB    | CEP290      |
| MAEL     | SLC44A5  | DPYD        |



## Supplementary data

|                |            |            |
|----------------|------------|------------|
| MAGEB10        | NRXN3      | ABCA8      |
| MAGEB18        | SLC35F4    | AC004687.2 |
| MAGEB5         | GPHB5      | TBX2       |
| MAGEB6         | RHOJ       | BCAS3      |
| MAGEB6B        | KCNH5      | RNF43      |
| MAP2K3         | GAD2       | ZFP91-CNTF |
| MAP3K4         | AC073612.1 | ATF7IP2    |
| MAP3K7         | DCD        | CFAP161    |
| MARCHF1        | OR8G1      | GTF2A1     |
| MAST4          | VPS26B     | GSKIP      |
| MAT2B          | IAPP       | DPH6       |
| MBD3L2B        | TCTN3      | MMP13      |
| MBTD1          | APBB1IP    | CNTF       |
| MCOLN2         | ANGPTL3    | NEGR1      |
| MCTP1          | GLB1L2     | WDR25      |
| MDGA2          | ZNF496     | ZDHHC6     |
| MEP1A          | PUS7L      | BLOC1S6    |
| MFSD9          | AC084337.2 | GOLT1B     |
| MITF           | OR5R1      | SMAD9      |
| MMEL1          | ELAVL4     | SERBP1     |
| MORN1          | CMPK1      | TCTEX1D1   |
| MRPL20         | CYP4Z1     | AK4        |
| MS4A13         | LORICRIN   | CFHR4      |
| MS4A18         | PGLYRP4    | CFHR5      |
| MS4A8          | PGLYRP3    | CFHR2      |
| MSANTD3-TMEFF1 | OR4K1      | SLFN12L    |
| MTA1           | OR2T8      | CFAP46     |
| MTR            | GBP6       | KCND3      |
| MTRNR2L12      | OR5M10     | UFM1       |
| MTRNR2L13      | OR8D4      | NAA30      |
| MTRNR2L5       | C1orf146   | CFAP45     |
| MUC15          | LCE2B      | KIFAP3     |
| MXRA8          | CYP4B1     | ROR1       |
| MYO16          | COA6       | C10orf71   |
| MYO18B         | OR10AG1    | NUP58      |
| MYO3B          | NLRP14     | SYT1       |
| NAT14          | OR51Q1     | CD69       |
| NATD1          | MYO3A      | ZFP91      |
| NCKAP1L        | CADM3      | OR2T11     |
| NETO1          | CYP2C9     | GPR83      |
| NLRP11         | OR52N2     | KLRC4      |
| NLRP2          | MMP26      | ANO2       |
| NLRP4          | OR52E6     | AC068775.1 |
| NLRP7          | OR51C1P    | NTF3       |
| NLRP9          | OR52N4     | KLRD1      |
| NOC2L          | ACTRT2     | C1orf158   |
| NOL4           | SH2D4B     | MTNR1B     |

## Supplementary data

|         |           |            |
|---------|-----------|------------|
| NOS1AP  | ERICH3    | TGFBR3     |
| NOSTRIN | OR2D2     | RXYLT1     |
| NOX3    | GRIP1     | SLCO3A1    |
| NOX4    | KIRREL1   | PTPN14     |
| NPHS2   | ASB17     | VAV3       |
| NPY     | ATXN7L3B  | ACSM3      |
| NPY2R   | VWA5A     | CEP128     |
| NRG1    | WSCD2     | BCO1       |
| NRK     | UNC79     | MAP2K6     |
| NRXN1   | HPX       | PDE3A      |
| NSG2    | PKP2      | MEIS2      |
| NTRK3   | ADARB2    | TMEM86A    |
| NUDCD2  | SLCO1B1   | ARHGAP11B  |
| NWD2    | MS4A14    | METTTL21C  |
| NXPE1   | CD1C      | USH2A      |
| NXPE4   | CD1B      | RRP15      |
| NYAP2   | PPFIBP2   | PTPRQ      |
| OCM2    | NEDD1     | SNX20      |
| ODF2L   | FOXD3     | WDR63      |
| ONECUT1 | OR2M7     | SPON1      |
| OPRM1   | DPY19L2   | AP3B2      |
| OR10A7  | ACKR1     | CR589904.2 |
| OR10H4  | ATRNL1    | ATM        |
| OR10J1  | LRRC7     | LRRC8B     |
| OR10J5  | LRRC40    | LRRC8C     |
| OR10Q1  | SPRR2B    | PDC        |
| OR10W1  | SPRR2E    | PLA2G4A    |
| OR11G2  | ZP4       | GHITM      |
| OR11H6  | MTRNR2L11 | C10orf99   |
| OR1A1   | MALRD1    | OR5AK2     |
| OR1A2   | ARL5B     | WT1        |
| OR1B1   | FANCM     | LHX1       |
| OR1D2   | CACNB2    | AL035078.4 |
| OR1E1   | EBLN1     | SSRP1      |
| OR1E2   | PTF1A     | PRG3       |
| OR1G1   | NSUN6     | RCN1       |
| OR1I1   | TLL2      | CWF19L2    |
| OR1J2   | GZMB      | MMP28      |
| OR1J4   | STXBP6    | C17orf50   |
| OR1L1   | MIS18BP1  | AATF       |
| OR1L3   | TMEM260   | LPO        |
| OR1L4   | OTX2      | MPO        |
| OR1L6   | NAA30     | TSPOAP1    |
| OR1L8   | FOXA1     | CCL3L1     |
| OR1N1   | NOVA1     | HEATR9     |
| OR1N2   | MIPOL1    | TBC1D3B    |
| OR1Q1   | TTC6      | CCL4L2     |

## Supplementary data

|         |            |          |
|---------|------------|----------|
| OR1S1   | SPRR2A     | ODR4     |
| OR1S2   | SPRR2D     | TPR      |
| OR2AP1  | RXRG       | SKIDA1   |
| OR2T2   | BARHL2     | LCE3A    |
| OR2T3   | HFM1       | DUSP23   |
| OR3A1   | NEBL       | APLNR    |
| OR3A2   | PLXDC2     | LRRC55   |
| OR3A3   | MSRB2      | P2RX3    |
| OR4A47  | LCE1A      | GPR52    |
| OR4B1   | KPRP       | MROH9    |
| OR4C3   | LCE1C      | FMO4     |
| OR4C5   | LCE1B      | RABGAP1L |
| OR4K13  | EDARADD    | SLC18A3  |
| OR4K14  | ERO1B      | CHAT     |
| OR4K15  | GPR137B    | DRGX     |
| OR4K17  | MT1HL1     | OGDHL    |
| OR4L1   | MTR        | C10orf53 |
| OR4N5   | RYR2       | MBL2     |
| OR4S1   | LCE1D      | FMO1     |
| OR4X1   | LCE1E      | FMO2     |
| OR4X2   | LCE1F      | FMO3     |
| OR5B12  | PRR9       | CFHR1    |
| OR5B17  | SPRR2F     | KCNT2    |
| OR5B2   | LELP1      | CFHR3    |
| OR5B3   | SPRR2G     | CFH      |
| OR5BS1P | IFI16      | RGS7     |
| OR5D14  | SPRR5      | RNF2     |
| OR6C1   | SLAMF1     | SH3BP5L  |
| OR6C2   | ITLN1      | FAM171A1 |
| OR6C3   | CD48       | ZNF672   |
| OR6C4   | LMX1A      | SLC39A12 |
| OR6C6   | CD84       | LYPD8    |
| OR6C65  | LY9        | PGBD2    |
| OR6C68  | PBX1       | MINDY3   |
| OR6C70  | NUF2       | ITGA8    |
| OR6C74  | FCER1A     | OR14I1   |
| OR6C75  | SLAMF7     | ZNF692   |
| OR6C76  | CD244      | PRKCQ    |
| OR6Q1   | SPRR1A     | SWT1     |
| OR7D2   | CCNJ       | DDI1     |
| OR7D4   | ZNF518A    | MSANTD4  |
| OR7E24  | BLNK       | KBTBD3   |
| OR7G1   | ENTPD1     | DCUN1D5  |
| OR7G3   | AL365273.2 | DYNC2H1  |
| OR8S1   | PYHIN1     | GREM2    |
| OR9I1   | SPRR3      | HMCN1    |
| OR9Q1   | SPRR4      | TRMT1L   |

Supplementary data

|           |          |            |
|-----------|----------|------------|
| OR9Q2     | SPRR1B   | PRG4       |
| OTOR      | SOX6     | WSCD2      |
| OVCH1     | OR6P1    | C1orf115   |
| PAK5      | PDE3B    | C12orf50   |
| PANK4     | SLC5A9   | SLC35D1    |
| PAX3      | RBMXL2   | PAWR       |
| PAXIP1    | WASHC3   | AC009070.1 |
| PCDH10    | OR6T1    | CCDC196    |
| PCDH15    | BTBD8    | VSIG8      |
| PCDH17    | RAB3GAP2 | RBP3       |
| PCDH20    | MARK1    | ZNF488     |
| PCLO      | CFAP54   | NKD1       |
| PCMTD1    | NOS1     | PIK3R5     |
| PCTP      | YME1L1   | GLYATL1B   |
| PDCD2L    | HSPA12A  | IL10RA     |
| PDE1C     | ACSS3    | REXO5      |
| PDE4D     | JAM3     | BDKRB1     |
| PDE6H     | OR10T2   | SLC30A10   |
| PDHA2     | NXPE2    | SEC23A     |
| PEG3      | C11orf42 | C12orf60   |
| PERM1     | MEGF6    | PRAMEF11   |
| PEX10     | FOXD2    | WDR78      |
| PEX5L     | MS4A3    | OXGR1      |
| PGGT1B    | KLRG1    | DLK1       |
| PGM5      | OXGR1    | TMEM98     |
| PHOX2B    | MS4A1    | TEX30      |
| PI15      | HSPB8    | GSG1L2     |
| PID1      | OR5P3    | ACSS3      |
| PIGT      | SVIP     | WSB2       |
| PIK3R4    | OR5A1    | SCEL       |
| PIWIL3    | OR4C12   | TUBA3C     |
| PKP2      | OR10Z1   | MTARC1     |
| PLA2G7    | PDZRN4   | C15orf48   |
| PLBD2     | RGS18    | FXYP4      |
| PLCH2     | TRABD2B  | MIER1      |
| PLEKHA7   | LCE2D    | METTL18    |
| PLEKHB2   | MRPL17   | ST8SIA1    |
| PLEKHN1   | ARHGEF16 | PRAMEF1    |
| PLAAT5    | FCRL4    | DENND1B    |
| PMP2      | TMEM132B | RCVRN      |
| POGK      | CRYZ     | GLMN       |
| POM121L12 | C12orf50 | ZNF423     |
| POTEC     | ZWINT    | STX3       |
| POTEE     | OR2AG2   | C2CD5      |
| PPARGC1A  | MS4A4E   | ITGBL1     |
| PPDPFL    | RBM19    | MPHOSPH6   |
| PPHLN1    | SPTA1    | AL445423.3 |

## Supplementary data

|          |          |             |
|----------|----------|-------------|
| PPM1H    | FAM78B   | DNAJC1      |
| PPP1R12C | OR51S1   | CLEC4C      |
| PPP1R21  | CAVIN3   | LMO3        |
| PPP2R5E  | OR6F1    | EMX2        |
| PPP4R3C  | CCDC196  | TBX4        |
| PPP6R1   | OR52J3   | CLEC4A      |
| PRAMEF14 | OMA1     | WLS         |
| PRAMEF15 | DAB1     | DIRAS3      |
| PRAMEF33 | FAF1     | GNG12       |
| PRDM2    | HOOK1    | RPE65       |
| PRDM9    | BARX2    | TCL1A       |
| PRICKLE1 | OR6K2    | PCNX2       |
| PRKCZ    | PDZK1IP1 | LEPR        |
| PRPF39   | EXO1     | ADRA2A      |
| PRR20A   | USH2A    | ANTXRL      |
| PRR20B   | GPATCH2  | PTPN20      |
| PRR20C   | ESRRG    | GPRIN2      |
| PRR20D   | SPATA17  | GDF10       |
| PRR20E   | RRP15    | GDF2        |
| PRXL2B   | BEND5    | IL12RB2     |
| PSKH2    | PIWIL1   | ADPRM       |
| PSMD10   | ASB2     | NAT9        |
| PSMD7    | SLC39A12 | PAX6        |
| PTPRB    | ATP1B1   | COMMD3-BMI1 |
| PTPRD    | OBI1     | AC015688.4  |
| PTPRH    | OR51A2   | C3AR1       |
| PTPRJ    | C1orf68  | PRRX1       |
| PTPRO    | OR10K1   | BPNT1       |
| PTPRR    | F5       | BMI1        |
| PURG     | C12orf42 | GCSH        |
| PUSL1    | PDPN     | C8B         |
| PXDNL    | FBXO21   | PIK3R6      |
| RAB28    | MS4A6A   | TMTC4       |
| RAB38    | FCRL2    | LHX9        |
| RAB3C    | IGSF9B   | AL355102.2  |
| RALYL    | TMEM132D | MYH3        |
| RASAL1   | TNR      | ENKUR       |
| RASGRF2  | ACAD8    | PAPOLA      |
| RBFOX1   | ITIH2    | HTATIP2     |
| RBM33    | NUP37    | CMC2        |
| RDH13    | OR52R1   | GDF3        |
| RELN     | SLC25A3  | IRX5        |
| RER1     | FOXE3    | INSL5       |
| RERG     | OR10K2   | EPRS1       |
| RFPL4A   | OR52N5   | KLRK1       |
| RFPL4AL1 | OR52N1   | KLRC4-KLRK1 |
| RGPD3    | RRP8     | AC010197.2  |

## Supplementary data

|          |            |            |
|----------|------------|------------|
| RGPD4    | ILK        | LDHB       |
| RGS21    | GBP7       | CHI3L2     |
| RGS6     | OR14K1     | PRLHR      |
| RGSL1    | PKN2       | DENND2D    |
| RIT2     | GRID1      | DEUP1      |
| RITA1    | BRINP2     | ZNF25      |
| RNF175   | OR10G9     | C14orf178  |
| RNF223   | CCDC27     | KLHDC7A    |
| ROBO1    | OR5M8      | CSNK1A1L   |
| ROBO2    | OR5M3      | SUPT20H    |
| RORA     | OR14C36    | PSMA1      |
| RP1      | RFC5       | STX8       |
| RPL10L   | PLD5       | ACSL5      |
| RPL28    | HBE1       | PHC1       |
| RPS6KC1  | GBP5       | PIFO       |
| RSU1     | EPHX4      | SLAMF8     |
| RTN1     | GCSAML-AS1 | CASP7      |
| RWDD3    | CACHD1     | GTF2B      |
| RYR3     | OR2M3      | TUB        |
| S100A7A  | LEPROT     | GBP2       |
| S100A7L2 | LEPR       | GBP7       |
| SAMD5    | AVPR1A     | CPEB1      |
| SAMD7    | OOSP2      | UGGT2      |
| SBK2     | OR51I2     | CLEC2B     |
| SBK3     | OR52D1     | KLRF2      |
| SCGB2B2  | VAX1       | SCN4B      |
| SCGN     | CPNE8      | DUOX2      |
| SCN11A   | OR8H1      | FLT1       |
| SCNN1D   | PRAMEF20   | DLGAP3     |
| SCYGR5   | OVCH2      | MYF5       |
| SDF4     | C1orf174   | GJB5       |
| SDK1     | TBC1D15    | GDE1       |
| SDS      | KCNT2      | ALOX5      |
| SDSL     | CAMK1G     | MARCHF8    |
| SERPINA7 | PRIMA1     | RAB37      |
| SETMAR   | OR8K5      | PDX1       |
| SEZ6L    | OR5F1      | GPR12      |
| SFRP2    | OR10G8     | ADCK1      |
| SGCZ     | IGF1       | ATMIN      |
| SGPP2    | OLFML1     | OTOGL      |
| SGSM1    | OR5L1      | TPTE2      |
| SH2D4B   | DPYD       | IGSF9      |
| SH3GL3   | OR2T6      | ABCC8      |
| SHH      | PARPBP     | CENPN      |
| SHISA3   | MS4A13     | BIVM-ERCC5 |
| SHISA7   | OR51B5     | KLRG1      |
| SHISA9   | ATP5F1C    | FANCF      |

Supplementary data

|          |            |           |
|----------|------------|-----------|
| SKI      | STIL       | SGIP1     |
| SLAMF6   | TNNI3K     | ZNF644    |
| SLC16A9  | GLMN       | TAGLN2    |
| SLC17A1  | SLC2A13    | SHF       |
| SLC17A3  | LRRK2      | SLC28A2   |
| SLC17A4  | C12orf40   | DUOX1     |
| SLC19A3  | OR5P2      | LIN7A     |
| SLC22A1  | LGR5       | NR2F2     |
| SLC22A10 | S100A12    | ASPM      |
| SLC22A2  | ZFC3H1     | PCSK6     |
| SLC22A24 | S100A9     | F13B      |
| SLC22A25 | S100A8     | ZBTB41    |
| SLC22A3  | THAP2      | GRIN2A    |
| SLC22A9  | FCRL5      | CRB1      |
| SLC25A27 | MUC19      | GATM      |
| SLC26A5  | TMPO       | NOD2      |
| SLC27A6  | A2M        | DIO3      |
| SLC35F1  | NEUROD4    | TMC3      |
| SLC35F4  | OR2B11     | TCF7L2    |
| SLC4A10  | OR6A2      | GXYLT1    |
| SLC7A13  | RIMBP2     | TMEM220   |
| SLC8A3   | OR14A2     | FAM204A   |
| SLC8B1   | BRINP3     | RASGEF1A  |
| SLC9A2   | ARFIP2     | RECQL     |
| SLC9C1   | OR5AR1     | PROSER1   |
| SMAD5    | PZP        | ASPG      |
| SMIM17   | OR56B4     | H4-16     |
| SMIM31   | OR8G5      | STON2     |
| SMIM36   | ABI1       | GLYATL2   |
| SMOC1    | AC118470.1 | RAB11FIP2 |
| SNRPB2   | INSC       | KITLG     |
| SNRPN    | OR2L3      | TUBGCP2   |
| SNTG1    | TBX5       | MFSD6L    |
| SOX17    | KSR2       | NTN1      |
| SPATA22  | C10orf67   | PRG2      |
| SPATA48  | TMTC2      | SCNN1B    |
| SPC25    | OR2D3      | SRGAP1    |
| SPINT3   | LUZP2      | PEBP1     |
| SPOCK3   | OR8D2      | SPATA7    |
| SSC5D    | OR51I1     | KLRF1     |
| SSU72P2  | AMY1C      | NME7      |
| SSU72P3  | KCNA3      | CCDC181   |
| SSU72P4  | KCNA2      | BLZF1     |
| SSU72P5  | AMY1B      | ATP1B1    |
| SSU72P7  | CD53       | SLC19A2   |
| STK31    | TRHDE      | GPRC5B    |
| STK33    | LRIF1      | C1orf112  |

## Supplementary data

|               |            |            |
|---------------|------------|------------|
| STON1         | SMPD1      | RERGL      |
| STON1-GTF2A1L | APBB1      | PIK3C2G    |
| STPG2         | CADM1      | EXOC5      |
| STXBP6        | CHRM3      | CDHR1      |
| SULT1C2       | TPP1       | ABCC9      |
| SULT1C3       | TAF10      | KCNJ8      |
| SUMF1         | OR8J3      | GSX1       |
| SVOPL         | DEPDC4     | HYDIN      |
| SYT1          | C1orf112   | PIP4K2A    |
| SYT16         | OR13G1     | PDZD8      |
| SYT4          | HELLS      | SMCO4      |
| SYT5          | OR51A4     | FOXJ2      |
| TADA1         | TYW3       | RPAP2      |
| TAFA2         | LRRC52     | MLLT10     |
| TAFA4         | OR8J1      | MTUS2      |
| TAS1R3        | SMIM12     | C1orf87    |
| TBC1D12       | OLFM3      | NUF2       |
| TBC1D22A      | OR8H3      | POLR1D     |
| TDRD5         | ST6GALNAC3 | KCNA10     |
| TDRD6         | CNTN1      | SPATA5L1   |
| TECRL         | TRPC6      | SFTA3      |
| TEDC1         | OR2L5      | VENTX      |
| TEDDM1        | MCOLN3     | CEPT1      |
| TENM2         | SOX5       | C15orf41   |
| TEX13A        | SPATA7     | ABCA5      |
| TEX15         | ASCL1      | AC092718.3 |
| TEX22         | OR2W3      | NKX6-2     |
| TEX36         | AMY1A      | UCK2       |
| TGFBRAP1      | DNHD1      | GYS2       |
| TIMM21        | ACSM6      | ANKRD49    |
| TJP2          | SLC10A2    | UNC45B     |
| TLCD4         | ROR1       | LMO4       |
| TLCD4-RWDD3   | UBE2U      | PKN2       |
| TLL1          | OR8D1      | SEL1L      |
| TMCO5A        | OR2T33     | LMO1       |
| TMEFF1        | OR10G2     | SLFN14     |
| TMEM100       | ANKRD26    | GLYATL1    |
| TMEM108       | OR4D11     | GPC5       |
| TMEM11        | GPR158     | LPXN       |
| TMEM114       | KIN        | PRMT3      |
| TMEM121       | OR2L2      | ADAM8      |
| TMEM150B      | OR52A1     | FAM90A1    |
| TMEM176A      | CHPT1      | DHX38      |
| TMEM176B      | MYBPC1     | HPR        |
| TMEM178B      | SCYL2      | CMTR2      |
| TMEM182       | TIMM10B    | SPX        |
| TMEM190       | HBG2       | RIMKLB     |



## Supplementary data

|          |             |            |
|----------|-------------|------------|
| TMEM211  | OR5D18      | ATP12A     |
| TMEM238  | AC104389.5  | A2ML1      |
| TMEM260  | NLRP3       | VTI1A      |
| TMEM38B  | OR4E1       | AP2B1      |
| TMEM86B  | OR51L1      | NECAP1     |
| TMTC1    | OR10X1      | MTARC2     |
| TNFRSF14 | AGBL4       | IL23R      |
| TNFRSF18 | CEP104      | C1orf94    |
| TNFRSF4  | DFFB        | SMIM12     |
| TNNI3    | OR51A7      | NANOG      |
| TNNT1    | OR51T1      | NANOGNB    |
| TOGARAM1 | WDR64       | HPSE2      |
| TOP1     | GAS2        | FBXO21     |
| TPCN1    | ZNF648      | RET        |
| TRAM1L1  | OR4D5       | FUT8       |
| TRIM24   | ACTR6       | GNAO1      |
| TRIM32   | CTSG        | RASL10B    |
| TRIM42   | OOSP1       | CLDN10     |
| TRIM49B  | AL162596.1  | MRPS14     |
| TRIM51GP | LCE6A       | CACYBP     |
| TRIM64C  | SMCP        | TNR        |
| TRIM77   | AL138899.3  | CENPF      |
| TRIP12   | STK33       | TSPAN19    |
| TRPM3    | TNFSF13B    | SLFN5      |
| TSHZ2    | IMMP1L      | RAN        |
| TTC29    | OR10G4      | MPP5       |
| TTC34    | DMRTA2      | GADD45A    |
| TTLL10   | LRRC47      | HMGB4      |
| TTLL7    | USP1        | PTGER3     |
| TTYH1    | OR52I1      | AC005833.1 |
| TYR      | CD5L        | SMYD2      |
| U2AF2    | TRIM22      | TMEM52B    |
| UBA2     | ENO4        | SMIM35     |
| UBE2J2   | PRAMEF17    | GJA4       |
| UBE2S    | OR51B4      | M6PR       |
| UNC5C    | CWF19L2     | CLEC14A    |
| UNC5D    | RPH3A       | PLCG2      |
| UNC79    | OR14A16     | CPXM2      |
| USP29    | FAM160A2    | SMCO3      |
| USP31    | GATA3       | ANO3       |
| UTP18    | PDSS1       | GLYAT      |
| VANGL2   | FPGT-TNNI3K | ZNF326     |
| VAV1     | SORBS1      | ANGPTL5    |
| VSIG1    | FAM181A     | SLC9A3R1   |
| VWC2     | CCDC59      | LYRM1      |
| WDR37    | BRDT        | FCRL6      |
| WFDC10A  | DCDC1       | GLT1D1     |

## Supplementary data

|         |              |          |
|---------|--------------|----------|
| WFDC11  | DNAJC24      | STX2     |
| WFDC2   | CCDC179      | VSIG10   |
| WFDC6   | ANO3         | TAOK3    |
| WFDC8   | ARL14EP      | TMEM132C |
| WFDC9   | MPPED2       | SLC15A4  |
| WSCD1   | KIAA1217     | OR5B21   |
| WTIP    | SHTN1        | TMPRSS4  |
| WWP1    | NUP58        | HS3ST3A1 |
| XIRP2   | OR10A5       | TWF1     |
| XYLT1   | TAF3         | GAS2     |
| YIPF7   | GRM5         | EFNB2    |
| ZFP28   | OR52L1       | STYK1    |
| ZIM2    | OR52W1       | WBP11    |
| ZIM3    | CNGA4        | ART4     |
| ZNF181  | PLPP4        | JAML     |
| ZNF30   | FGFR2        | SCN3B    |
| ZNF302  | KCNK18       | SCN2B    |
| ZNF317  | CC2D2B       | PDGFD    |
| ZNF470  | OR56A4       | PLBD1    |
| ZNF471  | OR56A5       | MAGOHB   |
| ZNF524  | OR52H1       | CLEC1B   |
| ZNF579  | UBQLN3       | CLEC2A   |
| ZNF580  | TRIM6-TRIM34 | CLEC1A   |
| ZNF581  | TRIM34       | CLEC7A   |
| ZNF582  | OR52E4       | KLRC2    |
| ZNF583  | OR52E5       | KLRC1    |
| ZNF599  | WDR11        | GRAMD1B  |
| ZNF628  | OR51M1       | CLECL1   |
| ZNF641  | OR6K6        | EDARADD  |
| ZNF667  | OR56A3       | EIF2S3B  |
| ZNF682  | CCDC172      | DSCAML1  |
| ZNF699  | DNTT         | AASDHPPT |
| ZNF704  | CCDC60       | GLP2R    |
| ZNF71   | OR56A1       | GUCY2C   |
| ZNF717  | OR5M9        | EXOSC8   |
| ZNF784  | TRIM6        | CLEC9A   |
| ZNF835  | OR52B2       | H2AJ     |
| ZNF865  | OR52B6       | CLEC12B  |
| ZNF93   | GFRA1        | CEP164   |
| ZBPB    | METTL25      | DNAH3    |
| ZPLD1   | OR5AP2       | STOML3   |
| ZSCAN5A | OR52E8       | KLRC3    |
|         | PPP4R4       | ENGASE   |
|         | SERPINA10    | RBFOX3   |
|         | SERPINA6     | LDLRAD4  |
|         | SERPINA1     | FAM210A  |
|         | SERPINA11    | RNMT     |

Supplementary data

|            |           |
|------------|-----------|
| SERPINA9   | PSMA8     |
| SERPINA12  | TAF4B     |
| SERPINA4   | KCTD1     |
| SERPINA5   | TRAPPC8   |
| AL049839.2 | RNF125    |
| SERPINA3   | RNF138    |
| GSC        | GAREM1    |
| VRK1       | MEP1B     |
| GOLGA6L2   | KIAA1328  |
| MKRN3      | CELF4     |
| MAGEL2     | MYO5B     |
| NDN        | CFAP53    |
| NPAP1      | MBD1      |
| GABRB3     | CXXC1     |
| GABRA5     | SKA1      |
| GABRG3     | MAPK4     |
| OCA2       | MBD2      |
| HERC2      | POLI      |
| GOLGA6L7   | STARD6    |
| APBA2      | C18orf54  |
| FAM189A1   | BOD1L2    |
| NSMCE3     | SERPINB2  |
| FAN1       | SERPINB10 |
| MTMR10     | HMSD      |
| TRPM1      | SERPINB8  |
| KLF13      | TMX3      |
| OTUD7A     | CCDC102B  |
| CHRNA7     | DOK6      |
| TMCO5A     | CD226     |
| AC090527.3 | RTTN      |
| SQOR       | SOCS6     |
| SEMA6D     | DIPK1C    |
| SLC24A5    | CNDP2     |
| MYEF2      | CNDP1     |
| CTXN2      | ZNF558    |
| SLC12A1    | MBD3L1    |
| ONECUT1    | ZNF333    |
| WDR72      | ZNF254    |
| UNC13C     | VSTM2B    |
| FOXB1      | POP4      |
| MEX3B      | PLEKHF1   |
| NTRK3      | C19orf12  |
| SV2B       | CCNE1     |
| CHD2       | URI1      |
| RGMA       | ZNF536    |
| MCTP2      | ZNF507    |
| ARRDC4     | DPY19L3   |

Supplementary data

|            |                |
|------------|----------------|
| ADAMTS17   | PDCD5          |
| CERS3      | ANKRD27        |
| LINS1      | RGS9BP         |
| RBFOX1     | NUDT19         |
| TMEM114    | TDRD12         |
| GRIN2A     | SLC7A9         |
| SYT17      | CEP89          |
| CLEC19A    | FAAP24         |
| TMC5       | RHPN2          |
| GPR139     | GPATCH1        |
| GP2        | WDR88          |
| UMOD       | LRP3           |
| PDILT      | SLC7A10        |
| ACSM5      | CEBPA          |
| ACSM2A     | CEBPG          |
| ACSM2B     | GRAMD1A        |
| ACSM3      | SCN1B          |
| ACSM1      | HPN            |
| THUMPD1    | AC020907.6     |
| ERI2       | FXD3           |
| HS3ST2     | LGI4           |
| PLK1       | FXD1           |
| ERN2       | FXD7           |
| CHP2       | FXD5           |
| PRKCB      | RPS19          |
| CACNG3     | CD79A          |
| HS3ST4     | ARHGEF1        |
| CBLN1      | ERFL           |
| C16orf78   | RABAC1         |
| SALL1      | AC010616.1     |
| HNRNPA1P48 | ATP1A3         |
| TOX3       | GRIK5          |
| SLC6A2     | ZNF175         |
| CES1       | ZNF83          |
| CES5A      | ZNF611         |
| GNAO1      | ZNF600         |
| CDH8       | ZNF28          |
| ZFX3       | ZNF468         |
| CNTNAP4    | ZNF320         |
| AC106741.2 | ZNF888         |
| MON1B      | ZNF816-ZNF321P |
| SYCE1L     | ZNF816         |
| ADAMTS18   | ERVV-1         |
| NUDT7      | ERVV-2         |
| VAT1L      | ZNF160         |
| CLEC3A     | ZNF415         |
| WWOX       | ZNF347         |

Supplementary data

|             |            |
|-------------|------------|
| MAF         | ZNF665     |
| DYNLRB2     | ZNF677     |
| CDYL2       | VN1R2      |
| MYH8        | VN1R4      |
| MYH4        | ZNF845     |
| MYH1        | ZNF525     |
| MYH2        | ZNF765     |
| TMEM238L    | AC022137.3 |
| PIRT        | ZNF761     |
| SHISA6      | ZNF813     |
| DNAH9       | ZNF331     |
| ZNF18       | LRATD1     |
| MAP2K4      | NBAS       |
| MYOCD       | DDX1       |
| ARHGAP44    | GDF7       |
| ELAC2       | LDAH       |
| KCNJ12      | CAPN13     |
| KCNJ18      | GALNT14    |
| MTRNR2L1    | CAPN14     |
| ASIC2       | EHD3       |
| CCL2        | CCDC85A    |
| CCL7        | BCL11A     |
| CCL11       | EHBP1      |
| CCL8        | OTX1       |
| CCL13       | MEIS1      |
| CCL1        | ETAA1      |
| TMEM132E    | C1D        |
| CCT6B       | WDR92      |
| ZNF830      | AC017083.3 |
| LIG3        | MRPL19     |
| RFFL        | GCFC2      |
| AC004223.3  | SUCLG1     |
| RAD51D      | EIF2AK3    |
| FNDC8       | DDX18      |
| NLE1        | CCDC93     |
| TAF15       | INSIG2     |
| HEATR9      | EN1        |
| CCL5        | MARCO      |
| RDM1        | HS6ST1     |
| LYZL6       | CCDC74B    |
| CCL16       | SMPD4      |
| CCL14       | MZT2B      |
| CCL15-CCL14 | TUBA3E     |
| CCL15       | CCDC115    |
| CCL23       | IMP4       |
| CCL18       | PTPN18     |
| CCL3        | GPR39      |

Supplementary data

|          |          |
|----------|----------|
| CCL4     | LYPD1    |
| UTP18    | NCKAP5   |
| CA10     | ZRANB3   |
| KIF2B    | LCT      |
| TOM1L1   | MCM6     |
| COX11    | DARS1    |
| STXBP4   | ARHGAP15 |
| HLF      | KIF5C    |
| MMD      | LYPD6B   |
| SMIM36   | LYPD6    |
| ANKFN1   | NR4A2    |
| NOG      | GP2      |
| SOX9     | GALNT5   |
| SLC39A11 | DPP4     |
| SSTR2    | GCG      |
| COG1     | FAP      |
| FAM104A  | IFIH1    |
| C17orf80 | GCA      |
| CPSF4L   | KCNH7    |
| CDC42EP4 | FIGN     |
| SDK2     | GRB14    |
| RPL38    | COBLL1   |
| TTYH2    | SLC38A11 |
| DNAI2    | EVX2     |
| KIF19    | HOXD13   |
| BTBD17   | HOXD12   |
| GPR142   | HOXD11   |
| GPRC5C   | HOXD10   |
| CD300A   | HOXD9    |
| CD300LB  | HOXD8    |
| CD300C   | HOXD3    |
| CD300LD  | HOXD4    |
| CD300E   | HOXD1    |
| RAB37    | MTX2     |
| CD300LF  | PPP1R1C  |
| EPB41L3  | PDE1A    |
| TMEM200C | DNAJC10  |
| L3MBTL4  | NCKAP1   |
| ARHGAP28 | DUSP19   |
| MC5R     | ZC3H15   |
| MC2R     | ITGAV    |
| ZNF519   | FAM171B  |
| KCTD1    | ZSWIM2   |
| AQP4     | TMEFF2   |
| CHST9    | SLC39A10 |
| DSC3     | DNAH7    |
| DSC2     | PLCL1    |

Supplementary data

|          |            |
|----------|------------|
| DSC1     | SATB2      |
| DSG1     | FTCDNL1    |
| DSG4     | DYTN       |
| DSG3     | MDH1B      |
| DSG2     | FASTKD2    |
| TTR      | PIKFYVE    |
| B4GALT6  | PTH2R      |
| SLC25A52 | IKZF2      |
| TRAPPC8  | SPAG16     |
| KLHL14   | VWC2L      |
| CCDC178  | BARD1      |
| ASXL3    | ABCA12     |
| NOL4     | ATIC       |
| CELF4    | FN1        |
| RIT2     | HAO1       |
| HMSD     | TMX4       |
| SERPINB8 | PLCB1      |
| CBLN2    | SPTLC3     |
| MUC16    | ISM1       |
| OR1M1    | TASP1      |
| OR7G2    | SEL1L2     |
| ZNF333   | MACROD2    |
| ADGRE2   | PCSK2      |
| OR7C1    | DZANK1     |
| OR7A5    | POLR3F     |
| OR7A10   | RBBP9      |
| OR7A17   | SEC23B     |
| OR7C2    | SMIM26     |
| SLC1A6   | AL121900.1 |
| CCDC105  | DTD1       |
| CYP4F12  | SCP2D1     |
| OR10H2   | SLC24A3    |
| OR10H3   | RALGAPA2   |
| OR10H5   | KIZ        |
| OR10H1   | NKX2-2     |
| CYP4F2   | CST4       |
| ZNF682   | CST1       |
| ZNF90    | CST2       |
| ZNF486   | CST5       |
| ZNF737   | GGTLC1     |
| ZNF626   | FAM83D     |
| ZNF66    | DHX35      |
| ZNF85    | CD40       |
| ZNF430   | CDH22      |
| ZNF714   | SLC35C2    |
| ZNF431   | ZFP64      |
| ZNF708   | CYP24A1    |

Supplementary data

|            |          |
|------------|----------|
| ZNF738     | PFDN4    |
| ZNF493     | DOK5     |
| AC010615.4 | CSTF1    |
| ZNF429     | CASS4    |
| ZNF100     | RTF2     |
| ZNF43      | GCNT7    |
| ZNF208     | FAM209A  |
| ZNF257     | FAM209B  |
| ZNF676     | TFAP2C   |
| ZNF729     | BMP7     |
| ZNF98      | SPO11    |
| ZNF492     | ZNF831   |
| ZNF99      | CDH4     |
| ZNF723     | BACH1    |
| ZNF728     | GRIK1    |
| ZNF730     | TIAM1    |
| ZNF724     | HUNK     |
| AC092329.3 | B3GALT5  |
| ZNF91      | IGSF5    |
| ZNF675     | BACE2    |
| ZNF681     | ABCG1    |
| ZNF726     | TFF3     |
| ZNF254     | Z82190.2 |
| UQCRFS1    | YWHAH    |
| VSTM2B     | FBXO7    |
| ZNF536     | SYN3     |
| TSHZ3      | TIMP3    |
| PEPD       | HMGXB4   |
| CHST8      | SCUBE1   |
| KCTD15     | MPPED1   |
| KLK5       | EFCAB6   |
| KLK6       | WNT7B    |
| KLK7       | BRD1     |
| KLK8       | PANX2    |
| AC011473.4 | TRABD    |
| KLK9       | SELENOO  |
| KLK10      | TUBGCP6  |
| KLK11      | HDAC10   |
| KLK12      | MAPK12   |
| KLK13      | MAPK11   |
| KLK14      | PLXNB2   |
| CTU1       | DENND6B  |
| SIGLEC9    | IQSEC1   |
| SIGLEC7    | NUP210   |
| CD33       | HDAC11   |
| SIGLECL1   | FBLN2    |
| IGLON5     | WNT7A    |



Supplementary data

|            |          |
|------------|----------|
| VSIG10L    | TBC1D5   |
| ETFB       | SATB1    |
| AC008750.8 | KAT2B    |
| CLDND2     | SGO1     |
| NKG7       | ZNF385D  |
| LIM2       | RARB     |
| C19orf84   | TOP2B    |
| SIGLEC10   | NGLY1    |
| SIGLEC8    | OXSM     |
| CEACAM18   | CMC1     |
| SIGLEC12   | STAC     |
| SIGLEC6    | DCLK3    |
| DPRX       | TRANK1   |
| LILRA2     | SCN11A   |
| LILRA1     | WDR48    |
| LILRB1     | GORASP1  |
| LILRB4     | TTC21A   |
| KIR3DL3    | CSRNP1   |
| KIR2DL3    | XIRP1    |
| KIR2DL1    | CX3CR1   |
| KIR2DL4    | CCR8     |
| KIR3DL1    | SLC25A38 |
| KIR3DL2    | RPSA     |
| FCAR       | MOBP     |
| NCR1       | MYRIP    |
| NLRP7      | EIF1B    |
| NLRP2      | ENTPD3   |
| NLRP4      | RPL14    |
| NLRP13     | ZNF619   |
| NLRP8      | ZNF620   |
| NLRP5      | ZNF621   |
| ZNF787     | CACNA1D  |
| ZNF444     | CACNA2D3 |
| GALP       | ERC2     |
| ZSCAN5B    | FHIT     |
| ZSCAN5C    | CADPS    |
| ZSCAN5A    | SYNPR    |
| EDDM13     | SNTN     |
| FAM110C    | KBTBD8   |
| SH3YL1     | SUCLG2   |
| ACP1       | CNTN3    |
| ALKAL2     | ROBO2    |
| TMEM18     | ROBO1    |
| SNTG2      | GBE1     |
| TPO        | CHMP2B   |
| PXDN       | POU1F1   |
| MYT1L      | ARL13B   |

Supplementary data

|               |            |
|---------------|------------|
| EIPR1         | STX19      |
| TRAPPC12      | DHFR2      |
| ADI1          | NSUN3      |
| AC108488.2    | CLDND1     |
| RNASEH1       | AC021660.3 |
| RPS7          | GPR15      |
| COLEC11       | CPOX       |
| ALLC          | MYH15      |
| DCDC2C        | CIP2A      |
| SOX11         | DZIP3      |
| CMPK2         | LSAMP      |
| RSAD2         | IGSF11     |
| RNF144A       | NDUFB4     |
| MYCN          | HGD        |
| CYRIA         | RABL3      |
| LDAH          | GTF2E1     |
| APOB          | STXBP5L    |
| TDRD15        | CSTA       |
| STON1         | CCDC58     |
| STON1-GTF2A1L | ATP2C1     |
| GTF2A1L       | ASTE1      |
| AC073082.1    | NEK11      |
| LHCGR         | NUDT16     |
| FSHR          | MRPL3      |
| NRXN1         | CPNE4      |
| VRK2          | PLOD2      |
| FANCL         | PLSCR4     |
| BCL11A        | PLSCR2     |
| LRRTM4        | PLSCR1     |
| REG3G         | PLSCR5     |
| REG1B         | MED12L     |
| REG1A         | P2RY14     |
| REG3A         | GPR87      |
| CTNNA2        | P2RY13     |
| LRRTM1        | P2RY12     |
| FOXI3         | IGSF10     |
| TEX37         | AADACL2    |
| RPIA          | AADAC      |
| TMEM182       | SUCNR1     |
| POU3F3        | RAP2B      |
| MRPS9         | MME        |
| GPR45         | STRIT1     |
| TGFBRAP1      | PLCH1      |
| CD8B2         | C3orf33    |
| ST6GAL2       | AC104472.3 |
| SLC5A7        | SLC33A1    |
| DPP10         | GMPS       |

Supplementary data

|           |             |
|-----------|-------------|
| RAB6C     | KCNAB1      |
| GPR148    | VEPH1       |
| AMER3     | PTX3        |
| ARHGEF4   | SLC66A1L    |
| SMIM39    | SHOX2       |
| FAM168B   | RSRC1       |
| PLEKHB2   | IQCJ-SCHIP1 |
| RAB6D     | SCHIP1      |
| MZT2A     | IL12A       |
| TUBA3D    | C3orf80     |
| CCDC74A   | AC079594.2  |
| ANKRD30BL | IFT80       |
| CXCR4     | SMC4        |
| THSD7B    | TRIM59      |
| HNMT      | KPNA4       |
| SPOPL     | NCEH1       |
| NXPH2     | ECT2        |
| LRP1B     | NLGN1       |
| KYNU      | NAALADL2    |
| ARHGAP15  | CLDN1       |
| RPRM      | CLDN16      |
| GALNT13   | TMEM207     |
| KCNJ3     | IL1RAP      |
| NR4A2     | GMNC        |
| GPD2      | OSTN        |
| SLC4A10   | UTS2B       |
| DPP4      | CCDC50      |
| KCNH7     | PYDC2       |
| FIGN      | ATP13A4     |
| GRB14     | OPA1        |
| SCN3A     | HMX1        |
| SCN2A     | DEFB131A    |
| CSRNP3    | SLC2A9      |
| GALNT3    | DRD5        |
| TTC21B    | WDR1        |
| SCN1A     | NKX3-2      |
| SCN9A     | BOD1L1      |
| SCN7A     | FGFBP1      |
| XIRP2     | FGFBP2      |
| DHRS9     | PROM1       |
| LRP2      | LDB2        |
| DUSP19    | QDPR        |
| NUP35     | CLRN2       |
| ZNF804A   | LAP3        |
| FSIP2     | MED28       |
| SLC39A10  | FAM184B     |
| DNAH7     | DCAF16      |

Supplementary data

|          |          |
|----------|----------|
| PTH2R    | NCAPG    |
| MAP2     | LCORL    |
| UNC80    | SLIT2    |
| RPE      | PACRGL   |
| KANSL1L  | KCNIP4   |
| ACADL    | PCDH7    |
| MYL1     | DCUN1D4  |
| LANCL1   | KIT      |
| CPS1     | EXOC1    |
| ERBB4    | CEP135   |
| SPAG16   | CRACD    |
| SLC19A3  | ADAMTS3  |
| SCYGR6   | CFAP299  |
| SCYGR7   | BMP3     |
| SCYGR8   | PRKG2    |
| CCL20    | RASGEF1B |
| DAW1     | GPRIN3   |
| SPHKAP   | SNCA     |
| PID1     | MMRN1    |
| DNER     | UNC5C    |
| BMP2     | ADH4     |
| PCSK2    | ADH6     |
| SLC24A3  | ADH1A    |
| RALGAPA2 | ADH7     |
| PAX1     | C4orf17  |
| MAFB     | TRMT10A  |
| PTPRT    | MTTP     |
| TSHZ2    | C4orf54  |
| DOK5     | DAPP1    |
| CBLN4    | LAMTOR3  |
| MC3R     | DNAJB14  |
| FAM210B  | H2AZ1    |
| AURKA    | SLC9B2   |
| CSTF1    | BDH2     |
| ZNF831   | CENPE    |
| EDN3     | MAD2L1   |
| PHACTR3  | PRDM5    |
| SYCP2    | NDNF     |
| FAM217B  | TNIP3    |
| PPP1R3D  | QRFPR    |
| CDH26    | ANXA5    |
| CDH4     | TMEM155  |
| LIPI     | EXOSC9   |
| RBM11    | CCNA2    |
| HSPA13   | BBS7     |
| SAMSN1   | TRPC3    |
| CXADR    | KIAA1109 |

Supplementary data

|           |            |
|-----------|------------|
| BTG3      | ADAD1      |
| C21orf91  | FAT4       |
| CHODL     | INTU       |
| TMPRSS15  | SLC25A31   |
| NCAM2     | HSPA4L     |
| GRIK1     | PLK4       |
| CLDN17    | MFSD8      |
| CLDN8     | ABHD18     |
| KRTAP24-1 | LARP1B     |
| KRTAP25-1 | MGAT4D     |
| KRTAP26-1 | ELMOD2     |
| KRTAP27-1 | UCP1       |
| KRTAP23-1 | TBC1D9     |
| KRTAP13-2 | RNF150     |
| KRTAP13-1 | ZNF330     |
| KRTAP13-3 | AC098588.2 |
| KRTAP13-4 | HHIP       |
| KRTAP15-1 | ANAPC10    |
| KRTAP19-1 | LSM6       |
| KRTAP19-2 | REELD1     |
| KRTAP19-3 | SLC10A7    |
| KRTAP19-4 | TTC29      |
| KRTAP19-5 | MAP9       |
| KRTAP19-6 | APELA      |
| KRTAP19-7 | TRIM61     |
| KRTAP22-2 | FAM218A    |
| KRTAP6-3  | TRIM60     |
| KRTAP6-2  | TRIM75P    |
| KRTAP22-1 | TMEM192    |
| KRTAP6-1  | CPE        |
| KRTAP20-1 | FBXO8      |
| KRTAP20-4 | CEP44      |
| KRTAP20-2 | HPGD       |
| KRTAP20-3 | GLRA3      |
| KRTAP21-3 | AGA        |
| KRTAP21-2 | TRAPPC11   |
| KRTAP21-1 | ADAMTS16   |
| KRTAP8-1  | ICE1       |
| KRTAP7-1  | MED10      |
| KRTAP11-1 | UBE2QL1    |
| KRTAP19-8 | NSUN2      |
| TIAM1     | SRD5A1     |
| PCP4      | TENT4A     |
| DSCAM     | ADCY2      |
| SLC5A1    | C5orf49    |
| C22orf42  | MTRR       |
| RFPL2     | FASTKD3    |

Supplementary data

|          |          |
|----------|----------|
| SLC5A4   | SEMA5A   |
| RFPL3    | TAS2R1   |
| RTCB     | SPEF2    |
| BPIFC    | OXCT1    |
| SYN3     | C5orf51  |
| LARGE1   | FBXO4    |
| ISX      | GHR      |
| TBC1D22A | ERCC8    |
| TAF5A    | NDUFAF2  |
| CHL1     | KIF2A    |
| CNTN6    | IPO11    |
| CNTN4    | RGS7BP   |
| IL5RA    | SHISAL2B |
| TRNT1    | MAST4    |
| CRBN     | CD180    |
| SUMF1    | SLC30A5  |
| LRRN1    | CCNB1    |
| SETMAR   | CENPH    |
| GRM7     | MRPS36   |
| KCNH8    | CDK7     |
| EFHB     | CCDC125  |
| RAB5A    | AK6      |
| PP2D1    | TAF9     |
| ZNF385D  | RAD17    |
| RARB     | MARVELD2 |
| LRRC3B   | POC5     |
| SCN11A   | RASGRF2  |
| CACNA1D  | CKMT2    |
| CHDH     | VCAN     |
| IL17RB   | HAPLN1   |
| ACTR8    | NR2F1    |
| SELENOK  | FAM172A  |
| CACNA2D3 | POU5F2   |
| ERC2     | KIAA0825 |
| FHIT     | SLF1     |
| SYNPR    | MCTP1    |
| TAF5A    | PAM      |
| TAF5A    | GIN1     |
| MDFIC2   | PPIP5K2  |
| ROBO2    | MACIR    |
| ROBO1    | NUDT12   |
| CADM2    | TMEM232  |
| NSUN3    | SLC25A46 |
| EPHA6    | WDR36    |
| ARL6     | CAMK4    |
| CRYBG3   | STARD4   |
| RIOX2    | EPB41L4A |

Supplementary data

|          |            |
|----------|------------|
| GABRR3   | COMMD10    |
| OR5AC2   | SEMA6A     |
| OR5H1    | DTWD2      |
| OR5H14   | DMXL1      |
| OR5H15   | TNFAIP8    |
| OR5H6    | HSD17B4    |
| OR5H2    | SRFBP1     |
| OR5K4    | LOX        |
| OR5K3    | ZNF474     |
| OR5K1    | AC010255.3 |
| OR5K2    | SNCAIP     |
| CLDND1   | SNX2       |
| DZIP3    | SNX24      |
| RETNLB   | PPIC       |
| TRAT1    | CHSY3      |
| GUCA1C   | FSTL4      |
| MORC1    | NEUROG1    |
| C3orf85  | CXCL14     |
| DPPA2    | SLC25A48   |
| DPPA4    | IL9        |
| LSAMP    | PRELID2    |
| IGSF11   | GRXCR2     |
| STXBP5L  | SH3RF2     |
| POLQ     | TCERG1     |
| ARGFX    | GPR151     |
| FBXO40   | PPP2R2B    |
| HCLS1    | STK32A     |
| GOLGB1   | DPYSL3     |
| IQCB1    | GLRA1      |
| EAF2     | GRIA1      |
| SLC15A2  | MRPL22     |
| ILDR1    | KIF4B      |
| CD86     | TENM2      |
| CASR     | SLIT3      |
| CSTA     | SPDL1      |
| CPNE4    | DOCK2      |
| EPHB1    | INSYN2B    |
| SOX14    | FOXI1      |
| RBP2     | C5orf58    |
| RBP1     | LCP2       |
| NMNAT3   | KCNIP1     |
| CLSTN2   | KCNMB1     |
| P2RY1    | DRD1       |
| ARHGEF26 | SFXN1      |
| DHX36    | HRH2       |
| GPR149   | CPLX2      |
| RSRC1    | DUSP22     |

Supplementary data

|             |                |
|-------------|----------------|
| MLF1        | IRF4           |
| GFM1        | EXOC2          |
| LXN         | HUS1B          |
| RARRES1     | FOXQ1          |
| MFSD1       | FOXF2          |
| IQCJ-SCHIP1 | BMP6           |
| IQCJ        | TXNDC5         |
| KPNA4       | BLOC1S5-TXNDC5 |
| ARL14       | BLOC1S5        |
| PPM1L       | EEF1E1-BLOC1S5 |
| B3GALNT1    | EEF1E1         |
| NMD3        | AL024498.2     |
| SPTSSB      | SYCP2L         |
| OTOL1       | ELOVL2         |
| SI          | SMIM13         |
| SLITRK3     | ERVFRD-1       |
| BCHE        | NEDD9          |
| ZBBX        | TMEM170B       |
| SERPINI2    | PHACTR1        |
| WDR49       | TBC1D7         |
| PDCD10      | CDKAL1         |
| SERPINI1    | TDP2           |
| GOLIM4      | ACOT13         |
| MECOM       | C6orf62        |
| ACTRT3      | H3C12          |
| MYNN        | H2AC17         |
| LRRC34      | H2BC17         |
| LRRIQ4      | OR2B2          |
| SPATA16     | DNAH8          |
| NLGN1       | UNC5CL         |
| SOX2        | OARD1          |
| FGF12       | TSPO2          |
| MB21D2      | APOBEC2        |
| PLAAT1      | NFYA           |
| ATP13A5     | TREML1         |
| ATP13A4     | TREM2          |
| RAB28       | TREML2         |
| KCNIP4      | TREML4         |
| ARAP2       | TREM1          |
| GRXCR1      | CD2AP          |
| COX7B2      | PKHD1          |
| TECRL       | FAM83B         |
| CENPC       | PRIM2          |
| STAP1       | IRAK1BP1       |
| UBA6        | PHIP           |
| GNRHR       | ELOVL4         |
| TMPRSS11D   | TTK            |



Supplementary data

|            |            |
|------------|------------|
| TMPRSS11A  | BCKDHB     |
| TMPRSS11F  | CYB5R4     |
| TMPRSS11B  | MRAP2      |
| YTHDC1     | CEP162     |
| TMPRSS11E  | RNGTT      |
| UGT2B17    | PNISR      |
| UGT2B15    | USP45      |
| UGT2B10    | PRDM13     |
| UGT2A3     | HACE1      |
| UGT2B7     | KPNA5      |
| UGT2B11    | FAM162B    |
| UGT2B28    | GPRC6A     |
| UGT2B4     | TBC1D32    |
| UGT2A1     | GJA1       |
| UGT2A2     | HEY2       |
| SULT1B1    | NCOA7      |
| AC108941.2 | HINT3      |
| SULT1E1    | TRMT11     |
| CSN1S1     | NMBR       |
| CSN2       | GJE1       |
| STATH      | VTG1       |
| HTN3       | ADGB       |
| HTN1       | PPP1R14C   |
| PRR27      | IYD        |
| ODAM       | PLEKHG1    |
| FDCSP      | SYNE1      |
| CSN3       | MYCT1      |
| CABS1      | FBXO5      |
| SMR3A      | MTRF1L     |
| SMR3B      | RGS17      |
| OPRPN      | PACRG      |
| MUC7       | AC013470.2 |
| AMTN       | SCIN       |
| GC         | ARL4A      |
| NPFFR2     | ETV1       |
| ADAMTS3    | DGKB       |
| PARM1      | AGMO       |
| NAA11      | MACC1      |
| GK2        | ITGB8      |
| RASGEF1B   | DNAH11     |
| MMRN1      | CDCA7L     |
| CCSER1     | NFE2L3     |
| GRID2      | HNRNPA2B1  |
| ATOH1      | CBX3       |
| UNC5C      | SNX10      |
| STPG2      | HOXA1      |
| CENPE      | HOXA2      |

Supplementary data

|            |            |
|------------|------------|
| TACR3      | HOXA3      |
| UGT8       | HOXA4      |
| NDST4      | HOXA5      |
| FREM3      | HOXA6      |
| GYPE       | HOXA7      |
| GYPB       | HOXA9      |
| GYPA       | AC004080.3 |
| AC098588.2 | HOXA10     |
| TTC29      | HOXA11     |
| DCHS2      | GHRHR      |
| PLRG1      | ADCYAP1R1  |
| FGB        | NPSR1      |
| FGA        | DPY19L1    |
| FGG        | ANLN       |
| LRAT       | STARD3NL   |
| RBM46      | AMPH       |
| FSTL5      | VPS41      |
| NAF1       | POU6F2     |
| NPY1R      | GLI3       |
| NPY5R      | ABCA13     |
| TKTL2      | SEMA3E     |
| TMA16      | SEMA3A     |
| MARCHF1    | SEMA3D     |
| CPE        | STEAP1     |
| GLRA3      | STEAP2     |
| GPM6A      | CFAP69     |
| STOX2      | FAM237B    |
| ENPP6      | GTPBP10    |
| FRG1       | CLDN12     |
| CTNND2     | HEPACAM2   |
| GHR        | VPS50      |
| FGF10      | GNGT1      |
| MRPS30     | TFPI2      |
| DEPDC1B    | GNG11      |
| ELOVL7     | BET1       |
| ERCC8      | COL1A2     |
| KIF2A      | CASD1      |
| IPO11      | SGCE       |
| LRRC70     | PEG10      |
| HTR1A      | PPP1R9A    |
| RNF180     | ORC5       |
| RGS7BP     | IMMP2L     |
| MAST4      | DOCK4      |
| SV2C       | GPR85      |
| IQGAP2     | SMIM30     |
| RASGRF2    | PPP1R3A    |
| COX7C      | FOXP2      |

Supplementary data

|          |         |
|----------|---------|
| TMEM161B | MDFIC   |
| ADGRV1   | TFEC    |
| MCTP1    | CFTR    |
| FAM174A  | ASZ1    |
| ST8SIA4  | KCND2   |
| SLCO4C1  | TSPAN12 |
| SLCO6A1  | PLXNA4  |
| TSLP     | CNTNAP2 |
| EPB41L4A | PTPRN2  |
| KCNN2    | VIPR2   |
| TRIM36   | ERICH1  |
| PGGT1B   | DLGAP2  |
| SEMA6A   | DEFA5   |
| DTWD2    | MSRA    |
| HSD17B4  | PRSS51  |
| FAM170A  | PRSS55  |
| FTMT     | RP1L1   |
| SLC27A6  | C8orf74 |
| ISOC1    | SOX7    |
| ADAMTS19 | PINX1   |
| MINAR2   | PINX1   |
| SMIM32   | XKR6    |
| TRPC7    | LONRF1  |
| PPP2R2B  | TRMT9B  |
| STK32A   | DLC1    |
| JAKMIP2  | C8orf48 |
| SPINK1   | GFRA2   |
| SCGB3A2  | NEFM    |
| C5orf46  | NEFL    |
| SPINK5   | DOCK5   |
| SPINK14  | GNRH1   |
| SPINK6   | KCTD9   |
| MARCOL   | CDCA2   |
| SPINK13  | ADRA1A  |
| SPINK7   | STMN4   |
| SPINK9   | TRIM35  |
| FBXO38   | PTK2B   |
| HTR4     | CHRNA2  |
| GLRA1    | EPHX2   |
| NMUR2    | CLU     |
| GRIA1    | SCARA3  |
| ATP10B   | PURG    |
| GABRB2   | WRN     |
| GABRA6   | NRG1    |
| GABRA1   | TTI2    |
| GABRG2   | MAK16   |
| KCNIP1   | RNF122  |

Supplementary data

|            |         |
|------------|---------|
| GABRP      | DUSP26  |
| RANBP17    | ZMAT4   |
| TLX3       | RPS20   |
| NSG2       | MOS     |
| MSX2       | PLAG1   |
| SLC35B3    | CHCHD7  |
| TFAP2A     | IMPAD1  |
| GCNT2      | ARMC1   |
| C6orf52    | MTFR1   |
| PAK1IP1    | CPA6    |
| TMEM14C    | PREX2   |
| TMEM14B    | C8orf34 |
| AL024498.2 | SULF1   |
| MAK        | SLC05A1 |
| GCM2       | PRDM14  |
| SYCP2L     | NCOA2   |
| PHACTR1    | TRAM1   |
| ID4        | TERF1   |
| MBOAT1     | SBSPON  |
| E2F3       | C8orf89 |
| NRSN1      | IMPA1   |
| DCDC2      | SLC10A5 |
| KAAG1      | ZFAND1  |
| MRS2       | CHMP4C  |
| GPLD1      | SNX16   |
| ALDH5A1    | MMP16   |
| KIAA0319   | NECAB1  |
| TDP2       | C8orf88 |
| OR2B6      | PIP4P2  |
| ZNF165     | OTUD6B  |
| ZSCAN16    | LRRC69  |
| ZKSCAN8    | SLC26A7 |
| ZSCAN9     | RUNX1T1 |
| ZKSCAN4    | TRIQQ   |
| NKAPL      | RIMS2   |
| ZSCAN26    | DPYS    |
| AL021997.3 | DCSTAMP |
| PGBD1      | LRP12   |
| ZSCAN31    | ZFPM2   |
| ZKSCAN3    | OXR1    |
| ZSCAN12    | ABRA    |
| ZSCAN23    | ANGPT1  |
| GPX6       | RSPO2   |
| GPX5       | EIF3E   |
| ZBED9      | EMC2    |
| TRIM27     | AARD    |
| ZNF311     | SLC30A8 |

Supplementary data

|          |          |
|----------|----------|
| OR2W1    | MAL2     |
| OR2B3    | CCN3     |
| OR2J1    | EFR3A    |
| OR2J3    | TMEM71   |
| OR2J2    | ZFAT     |
| OR14J1   | KCNK9    |
| OR5V1    | TRAPPC9  |
| OR12D3   | TSNARE1  |
| OR12D2   | ADGRB1   |
| OR11A1   | ARC      |
| OR10C1   | DMRT1    |
| OR2H1    | SMARCA2  |
| MAS1L    | RFX3     |
| OR2I1P   | TTC39B   |
| UBD      | SNAPC3   |
| GABBR1   | PSIP1    |
| OR2H2    | CCDC171  |
| MOG      | CNTLN    |
| ZFP57    | SH3GL2   |
| HLA-F    | ADAMTSL1 |
| DNAH8    | TUSC1    |
| GLP1R    | CAAP1    |
| SAYSD1   | PLAA     |
| KCNK5    | IFT74    |
| KCNK17   | LRRC19   |
| KCNK16   | TEK      |
| KIF6     | EQTN     |
| DAAM2    | MOB3B    |
| MOCS1    | CEMIP2   |
| LRFN2    | ABHD17B  |
| CD2AP    | C9orf85  |
| ADGRF2   | C9orf57  |
| ADGRF4   | ZFAND5   |
| OPN5     | TMC1     |
| PTCHD4   | ALDH1A1  |
| MMUT     | ANXA1    |
| CENPQ    | VPS13A   |
| GLYATL3  | GNA14    |
| C6orf141 | CEP78    |
| RHAG     | PSAT1    |
| CRISP2   | AGTPBP1  |
| CRISP3   | CKS2     |
| PGK2     | SECISBP2 |
| CRISP1   | SEMA4D   |
| DEFB133  | GADD45G  |
| DEFB114  | ROR2     |
| DEFB113  | SPTLC1   |

Supplementary data

|            |            |
|------------|------------|
| DEFB110    | FGD3       |
| DEFB112    | SUSD3      |
| TFAP2D     | CARD19     |
| TFAP2B     | NINJ1      |
| PKHD1      | WNK2       |
| HCRTR2     | PHF2       |
| GFRAL      | BARX1      |
| HMGCLL1    | GABBR2     |
| BMP5       | ANKS6      |
| ADGRB3     | CACNA1B    |
| HTR1B      | NLGN4X     |
| MEI4       | GLRA2      |
| HTR1E      | FANCB      |
| CGA        | MOSPD2     |
| EPHA7      | ASB9       |
| MANEA      | ASB11      |
| FUT9       | PIGA       |
| UFL1       | VEGFD      |
| FHL5       | PIR        |
| GPR63      | BMX        |
| NDUFAF4    | ACE2       |
| KLHL32     | AC097625.2 |
| MMS22L     | CLTRN      |
| POU3F2     | CA5B       |
| FBXL4      | ZRSR2      |
| FAXC       | AP1S2      |
| COQ3       | NHS        |
| GRIK2      | SCML1      |
| HACE1      | SCML2      |
| FRK        | MAGEB16    |
| GPRC6A     | CCNB3      |
| RFX6       | DGKK       |
| VGLL2      | NUDT10     |
| ROS1       | EZHIP      |
| AL132671.2 | NUDT11     |
| DCBLD1     | TRO        |
| GOPC       | PFKFB1     |
| NUS1       | APEX2      |
| SLC35F1    | ALAS2      |
| HSF2       | PAGE2B     |
| SERINC1    | FAM104B    |
| PKIB       | MTRNR2L10  |
| FABP7      | RRAGB      |
| SMPDL3A    | UBQLN2     |
| CLVS2      | ZXDA       |
| TRDN       | AMER1      |
| NKAIN2     | ASB12      |

Supplementary data

|            |          |
|------------|----------|
| GRM1       | KIF4A    |
| RAB32      | GDPD2    |
| ADGB       | DLG3     |
| VIP        | RADX     |
| OPRM1      | RNF128   |
| IPCEF1     | PAK3     |
| AL357075.4 | ALG13    |
| LPA        | TRPC5    |
| PLG        | TRPC5OS  |
| MAP3K4     | ARHGAP36 |
| AGPAT4     | FMR1     |
| PRKN       | FMR1NB   |
| PACRG      |          |
| C6orf118   |          |
| PDE10A     |          |
| TBXT       |          |
| PRR18      |          |
| SFT2D1     |          |
| MPC1       |          |
| RPS6KA2    |          |
| RAMACL     |          |
| AL159163.1 |          |
| RNASET2    |          |
| FGFR1OP    |          |
| CCR6       |          |
| TCP10L2    |          |
| GPR31      |          |
| UNC93A     |          |
| TTLL2      |          |
| TCP10      |          |
| AFDN       |          |
| KIF25      |          |
| FRMD1      |          |
| DACT2      |          |
| SMOC2      |          |
| ICA1       |          |
| NXPH1      |          |
| NDUFA4     |          |
| PHF14      |          |
| THSD7A     |          |
| TMEM106B   |          |
| VWDE       |          |
| AC013470.2 |          |
| TWISTNB    |          |
| TMEM196    |          |
| ABCB5      |          |
| SP8        |          |

Supplementary data

SP4  
DNAH11  
C7orf31  
NPVF  
NEUROD6  
ITPRID1  
PPP1R17  
PDE1C  
NPSR1  
TBX20  
ANLN  
AOAH  
ELMO1  
GPR141  
EPDR1  
NME8  
SFRP4  
STARD3NL  
POU6F2  
ABCA13  
VWC2  
ZPBP  
VSTM2A  
PCLO  
SEMA3E  
GRM3  
KIAA1324L  
DMTF1  
TMEM243  
CROT  
ABCB4  
ABCB1  
RUNDC3B  
SLC25A40  
DBF4  
ADAM22  
SRI  
STEAP4  
ZNF804B  
TEX47  
VPS50  
CALCR  
GNGT1  
PPP1R9A  
PON1  
PON3  
PON2



Supplementary data

ASB4  
PDK4  
DYNC11  
SLC25A13  
SEM1  
DLX6  
DLX5  
SDHAF3  
TAC1  
ASNS  
RELN  
IMMP2L  
DOCK4  
CFTR  
ASZ1  
CTTNBP2  
LSM8  
ANKRD7  
PTPRZ1  
AASS  
FEZF1  
CADPS2  
RNF133  
RNF148  
TAS2R16  
SLC13A1  
IQUB  
NDUFA5  
ASB15  
LMOD2  
WASL  
HYAL4  
SPAM1  
TMEM229A  
SSU72P8  
GPR37  
C7orf77  
POT1  
GRM8  
TMEM178B  
AGK  
DENND11  
WEE2  
SSBP1  
TAS2R3  
TAS2R4  
TAS2R5

Supplementary data

PRSS37  
MGAM  
OR9A4  
CLEC5A  
TAS2R38  
MGAM2  
PRSS58  
MTRNR2L6  
PRSS1  
PRSS2  
EPHB6  
TRPV6  
TRPV5  
LLCFC1  
KEL  
OR9A2  
OR6V1  
PIP  
TAS2R39  
TAS2R40  
GSTK1  
TMEM139  
CASP2  
CLCN1  
FAM131B  
ZYG  
EPHA1  
OR2F1  
OR6B1  
OR2A5  
OR2A25  
OR2A12  
OR2A2  
OR2A14  
ARHGEF5  
NOBOX  
TPK1  
CNTNAP2  
ZNF467  
ZNF862  
ATP6V0E2  
ACTR3C  
ZBED6CL  
LRRC61  
RARRES2  
REPIN1  
ZNF775

Supplementary data

AC073111.4  
GIMAP8  
GIMAP7  
GIMAP4  
GIMAP6  
GIMAP2  
DPP6  
SHH  
PTPRN2  
CSMD1  
SGCZ  
ADAM28  
ADAMDEC1  
ADAM7  
ADRA1A  
PURG  
NRG1  
ADAM18  
ADAM2  
IDO1  
IDO2  
TCIM  
ZMAT4  
ST18  
ALKAL1  
RB1CC1  
NPBWR1  
OPRK1  
RP1  
XKR4  
TMEM68  
TGS1  
LYN  
SDR16C5  
CA8  
NKAIN3  
GGH  
TTPA  
YTHDF3  
BHLHE22  
CYP7B1  
PREX2  
C8orf34  
TRAM1  
LACTB2  
XKR9  
EYA1

Supplementary data

MSC  
TRPA1  
KCNB2  
TERF1  
CRISPLD1  
HNF4G  
FABP12  
RALYL  
LRRCC1  
E2F5  
RBIS  
CA13  
CA1  
CA3  
CA2  
WWP1  
RMDN1  
CPNE3  
CNGB3  
CNBD1  
TRIQK  
TMEM74  
TRHR  
NUDCD1  
ENY2  
PKHD1L1  
EBAG9  
SYBU  
KCNV1  
CSMD3  
OC90  
AC100868.1  
HHLA1  
KCNQ3  
LRRC6  
TMEM71  
FAM135B  
COL22A1  
KCNK9  
DMRT1  
DMRT3  
DMRT2  
DMAC1  
PTPRD  
IZUMO3  
MOB3B  
IFNK

Supplementary data

C9orf72  
LINGO2  
PGM5  
TMEM252  
PIP5K1B  
FAM122A  
PRKACG  
FXN  
AL358113.1  
TRPM3  
C9orf57  
GDA  
ANXA1  
RORB  
TRPM6  
C9orf40  
CARNMT1  
NMRK1  
OSTF1  
PCSK5  
RFK  
GNA14  
CEP78  
RASEF  
FRMD3  
IDNK  
UBQLN1  
GKAP1  
KIF27  
C9orf64  
HNRNPK  
RMI1  
SLC28A3  
NTRK2  
AGTPBP1  
SEMA4D  
DIRAS2  
SYK  
PLPPR1  
BAAT  
MRPL50  
ZNF189  
ALDOB  
PGAP4  
RNF20  
GRIN3A  
PPP3R2

Supplementary data

CYLC2  
SMC2  
OR13F1  
OR13C4  
OR13C3  
OR13C8  
OR13C5  
OR13C2  
OR13C9  
OR13D1  
ASTN2  
AL160272.2  
TLR4  
BRINP1  
CDK5RAP2  
SCML1  
RAI2  
BEND2  
FAM47A  
KLF8
